# Supplementary material
Source: MDPI journal article supplement (https://www.mdpi.com/search?q=molbank-2022-M1490)

**Supplementary Material:**  
**2-((4-(2-Ethylhexyl)-1,2,3,3a,4,8b-hexahydrocyclopenta[*b*]indol-7-yl)methylene)malononitrile**

Nikita S. Gudim, Ekaterina A. Knyazeva,\* Konstantin P. Trainov, and Oleg A. Rakitin

<sup>1</sup> N. D. Zelinsky Institute of Organic Chemistry Russian Academy of Sciences, 47 Leninsky Prospekt, Moscow, 119991, Russia; orakitin@ioc.ac.ru

**Figure S1.** <sup>1</sup>H NMR spectrum of 4-(2-ethylhexyl)-1,2,3,3a,4,8b-hexahydrocyclopenta[*b*]indole-7-carbaldehyde **3**.

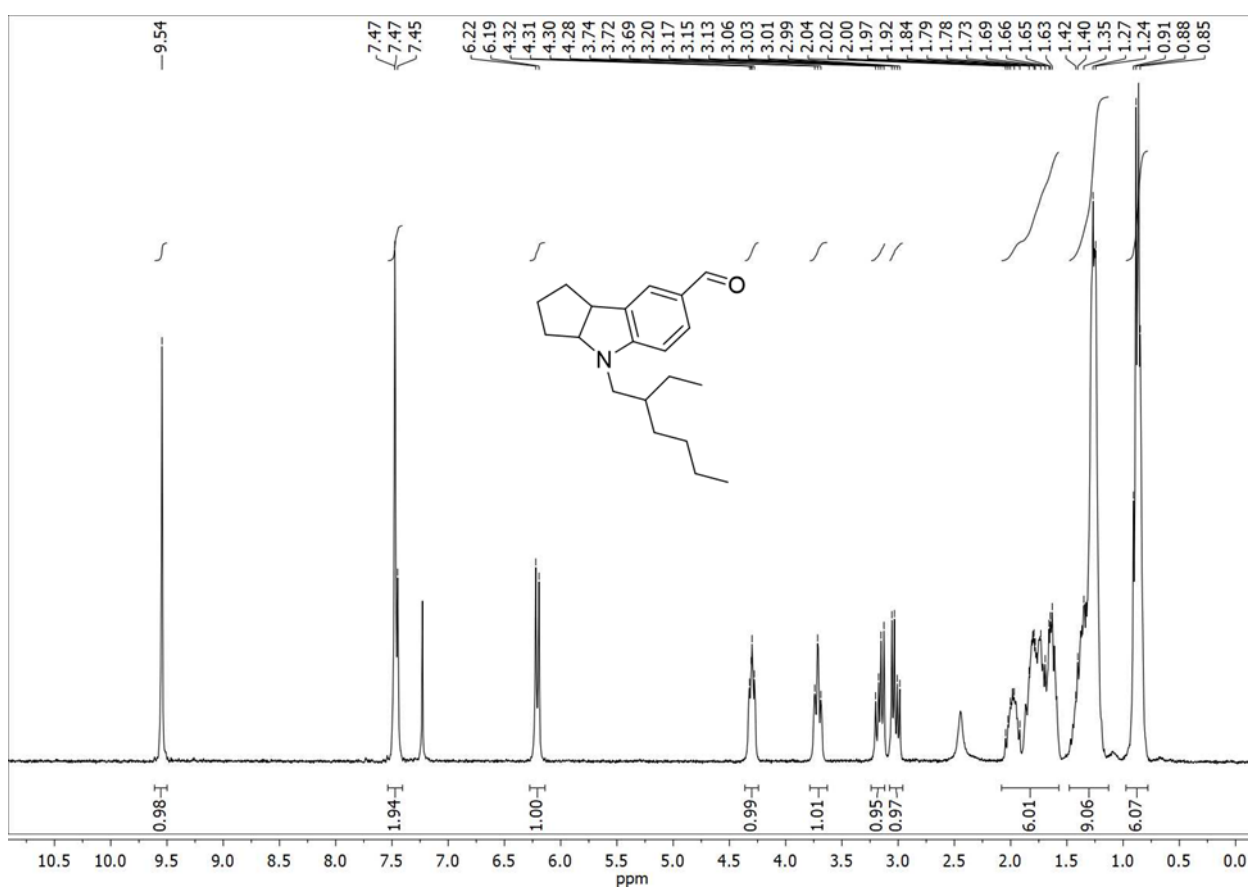

**Figure S2.**  $^{13}\text{C}$  NMR spectrum of 4-(2-ethylhexyl)-1,2,3,3a,4,8b-hexahydrocyclopenta[b]indole-7-carbaldehyde **3**.

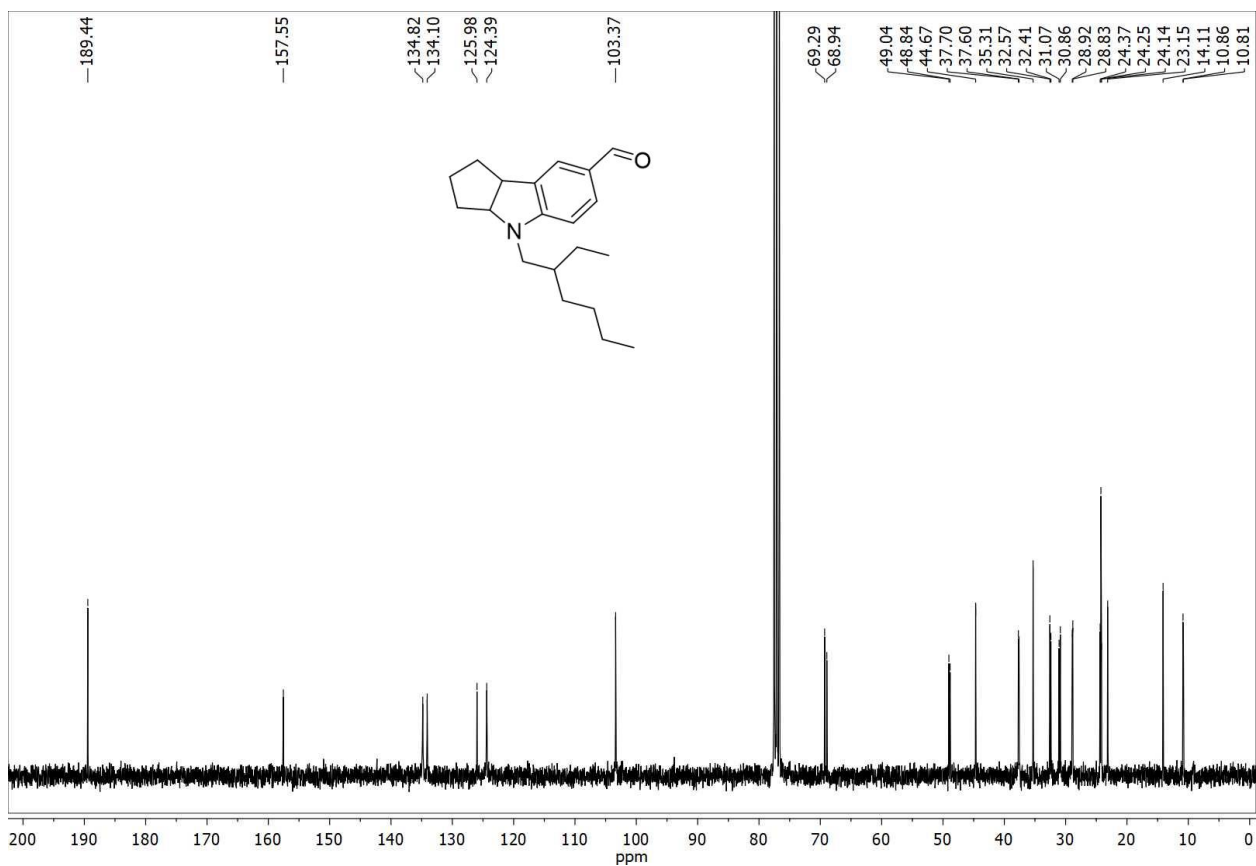

**Figure S3.** IR spectrum of 4-(2-ethylhexyl)-1,2,3,3a,4,8b-hexahydrocyclopenta[b]indole-7-carbaldehyde **3**.

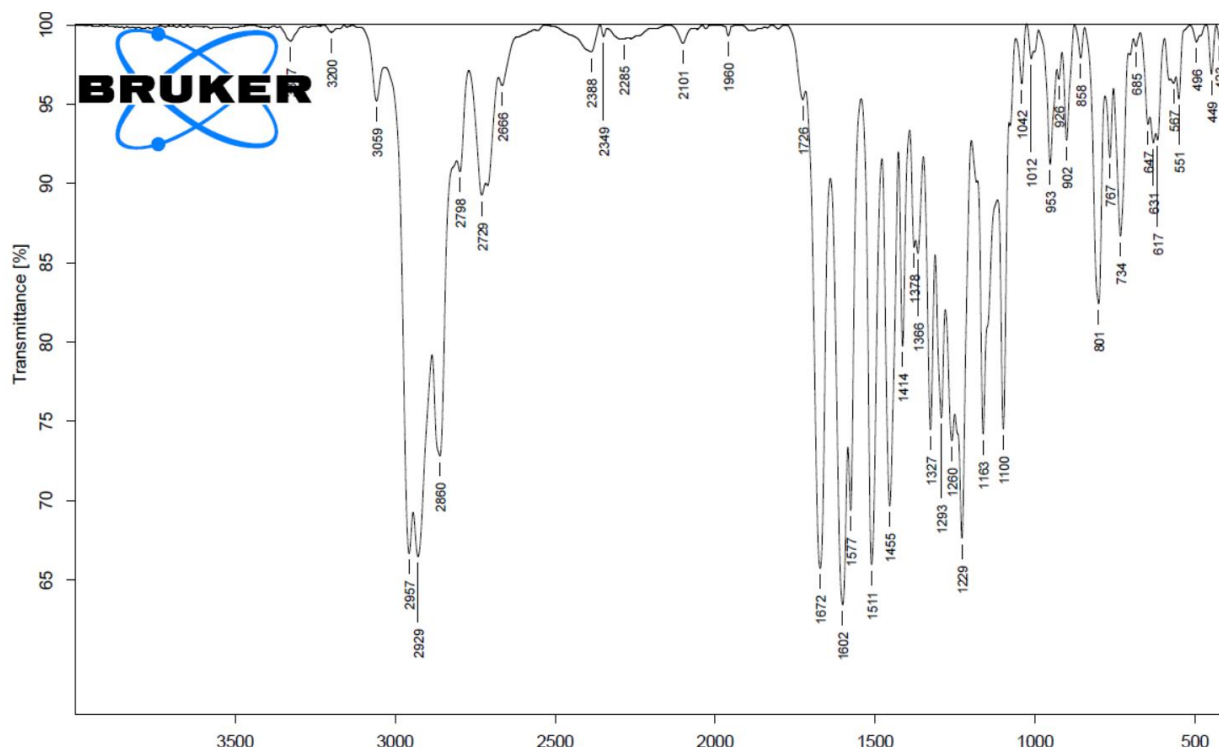

**Figure S4.** HRMS spectrum of 4-(2-ethylhexyl)-1,2,3,3*a*,4,8*b*-hexahydrocyclopenta[*b*]indole-7-carbaldehyde **3**.

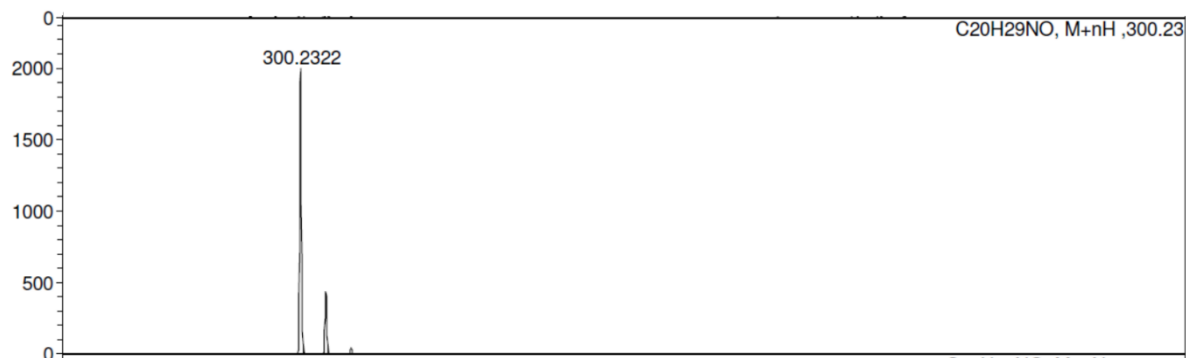

**Figure S5.** UV spectrum of 4-(2-ethylhexyl)-1,2,3,3*a*,4,8*b*-hexahydrocyclopenta[*b*]indole-7-carbaldehyde **3**.

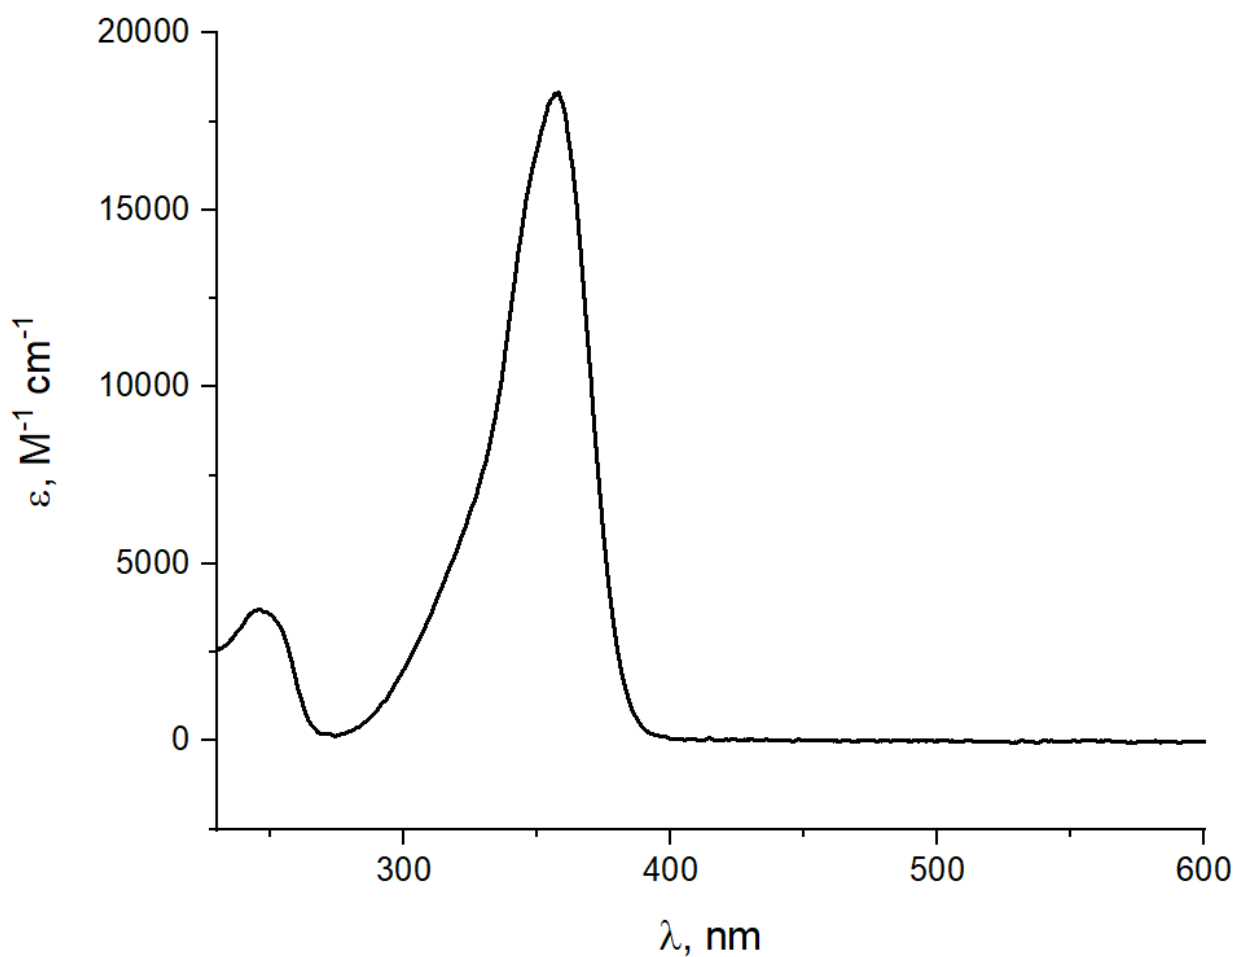

**Figure S6.** Mass-spectrum of 4-(2-ethylhexyl)-1,2,3,3*a*,4,8*b*-hexahydrocyclopenta[*b*]indole-7-carbaldehyde **3**.

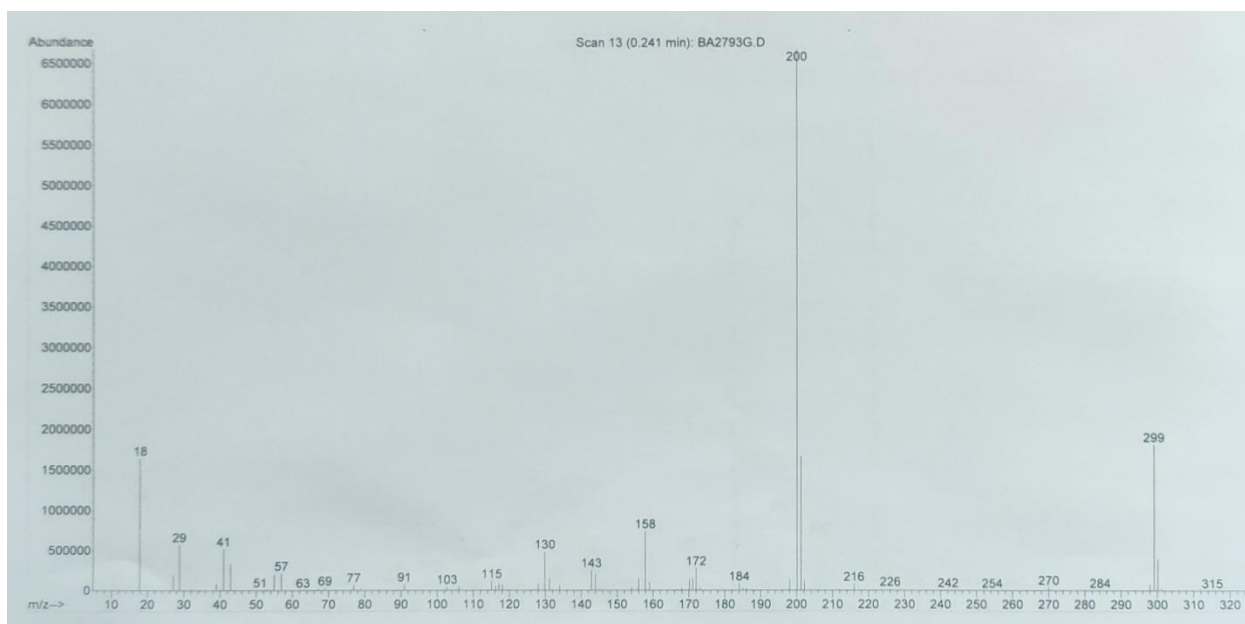

**Figure S7.**  $^1\text{H}$  NMR spectrum of 2-((4-(2-ethylhexyl)-1,2,3,3*a*,4,8*b*-hexahydrocyclopenta[*b*]indol-7-yl)methylene)malononitrile **1**.

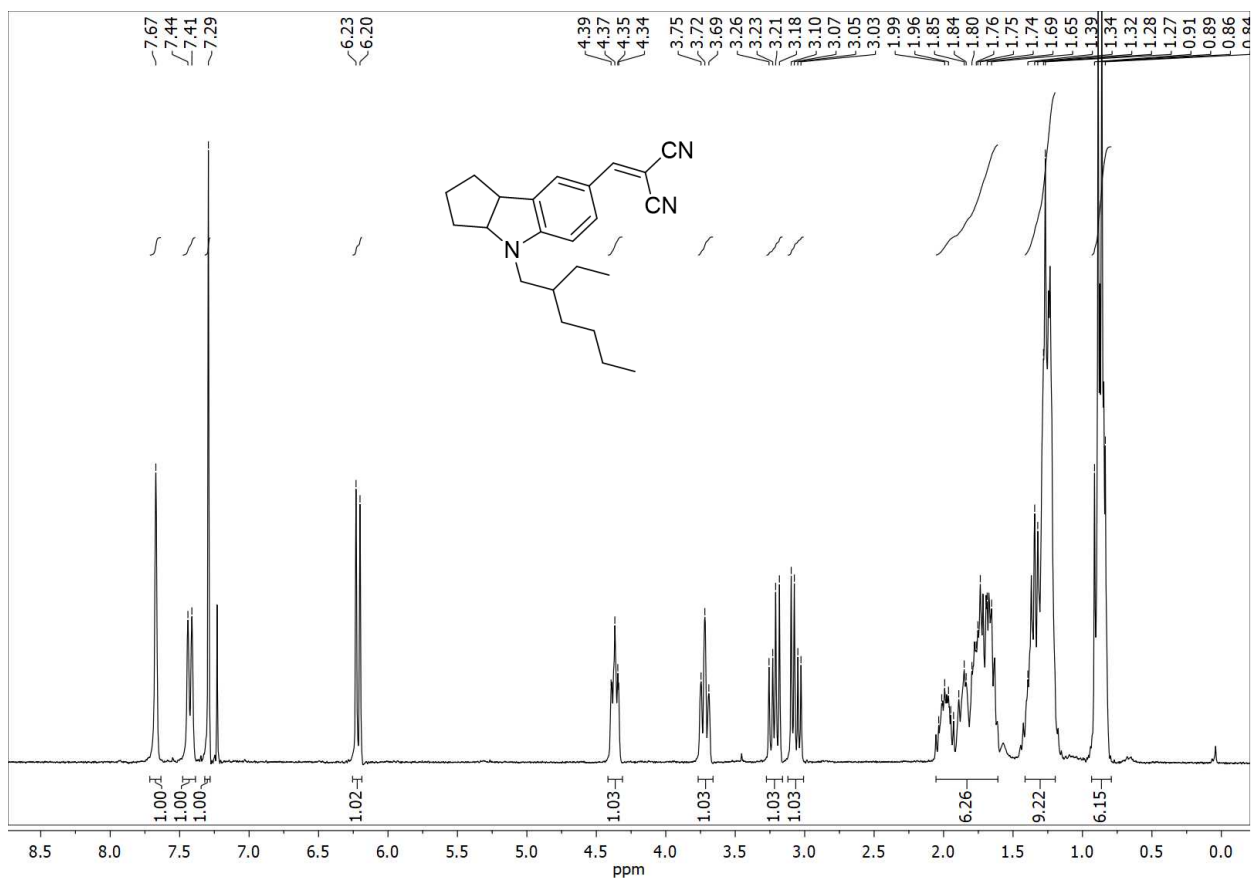

**Figure S8.**  $^{13}\text{C}$  NMR spectrum of 2-((4-(2-ethylhexyl)-1,2,3,3*a*,4,8*b*-hexahydrocyclopenta[*b*]indol-7-yl)methylene)malononitrile **1**.

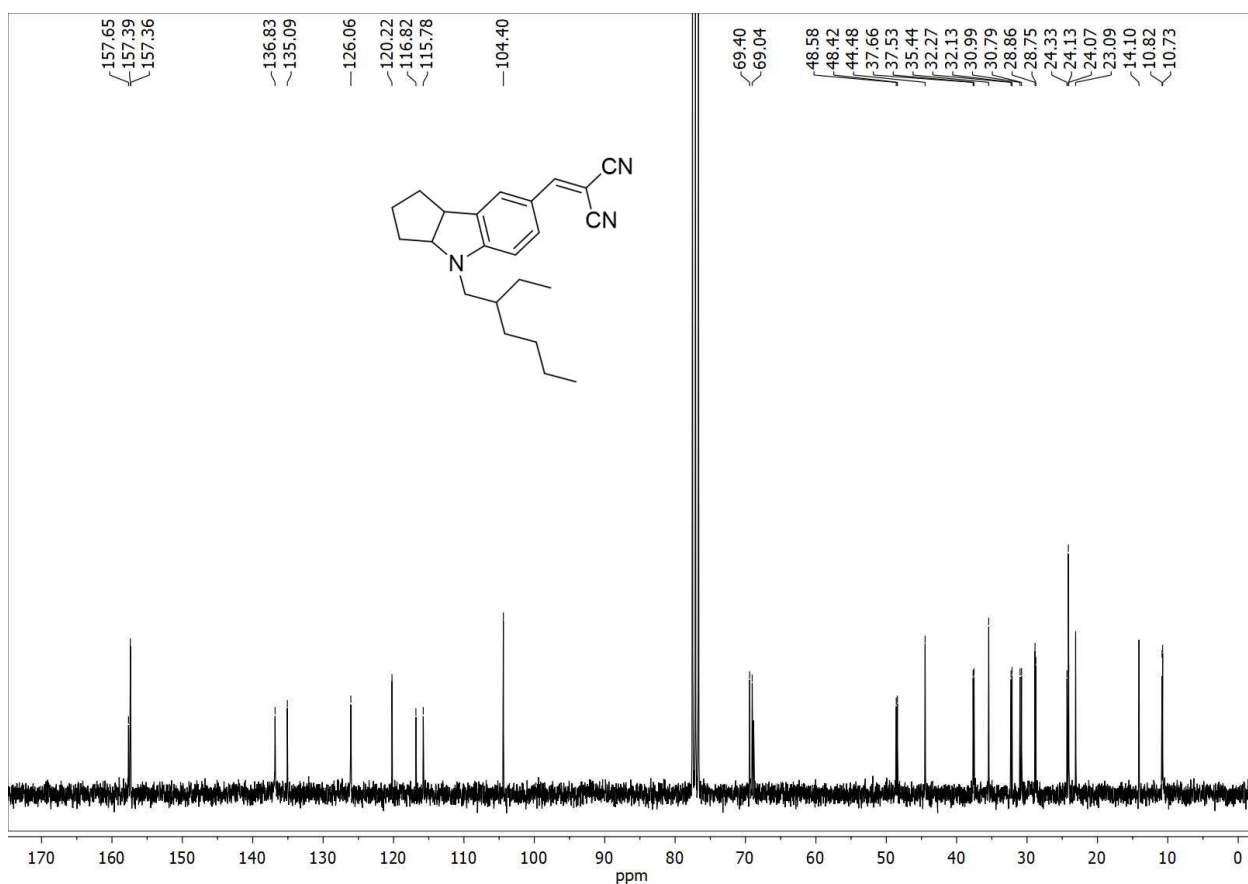

**Figure S9.** IR spectrum of 2-((4-(2-ethylhexyl)-1,2,3,3*a*,4,8*b*-hexahydrocyclopenta[*b*]indol-7-yl)methylene)malononitrile **1**.

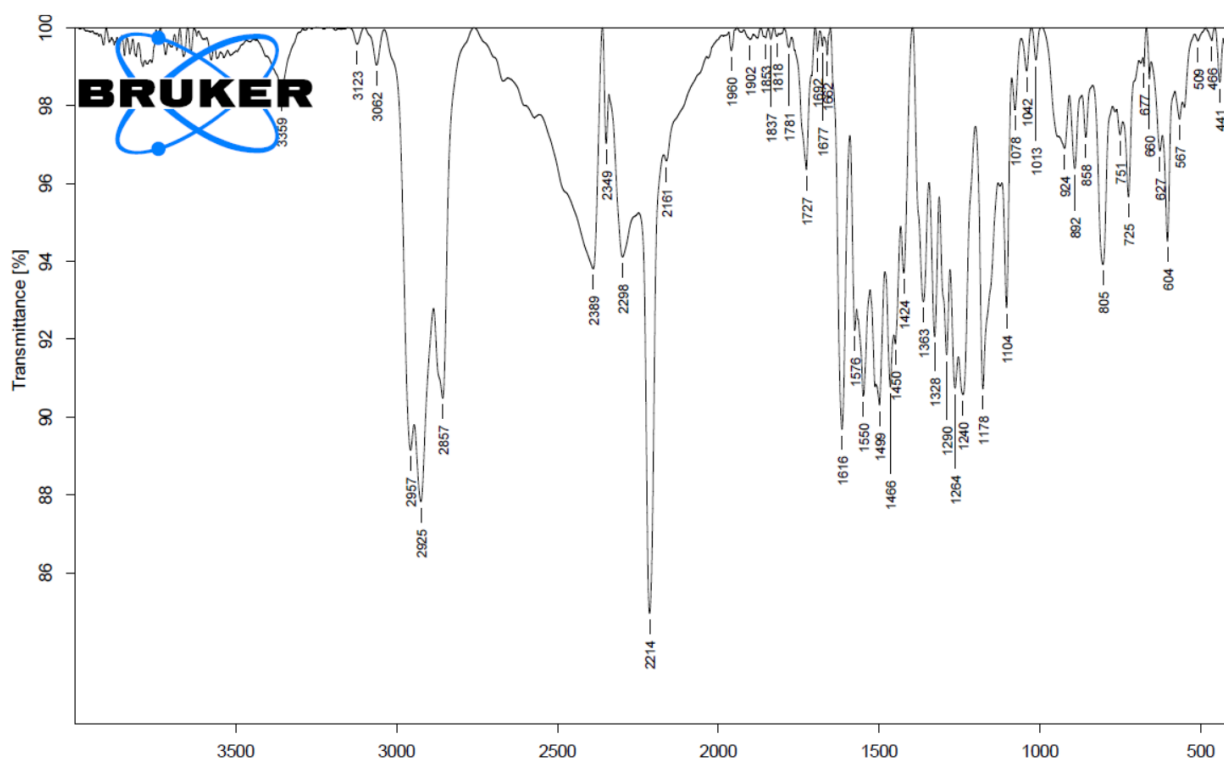

**Figure S10.** HRMS spectrum of 2-((4-(2-ethylhexyl)-1,2,3,3*a*,4,8*b*-hexahydrocyclopenta[*b*]indol-7-yl)methylene)malononitrile **1**.

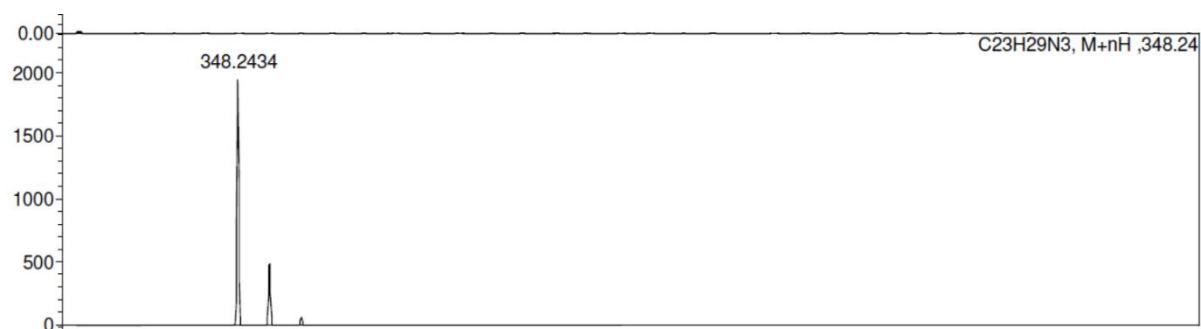

**Figure S11.** UV spectrum of 2-((4-(2-ethylhexyl)-1,2,3,3*a*,4,8*b*-hexahydrocyclopenta[*b*]indol-7-yl)methylene)malononitrile **1**.

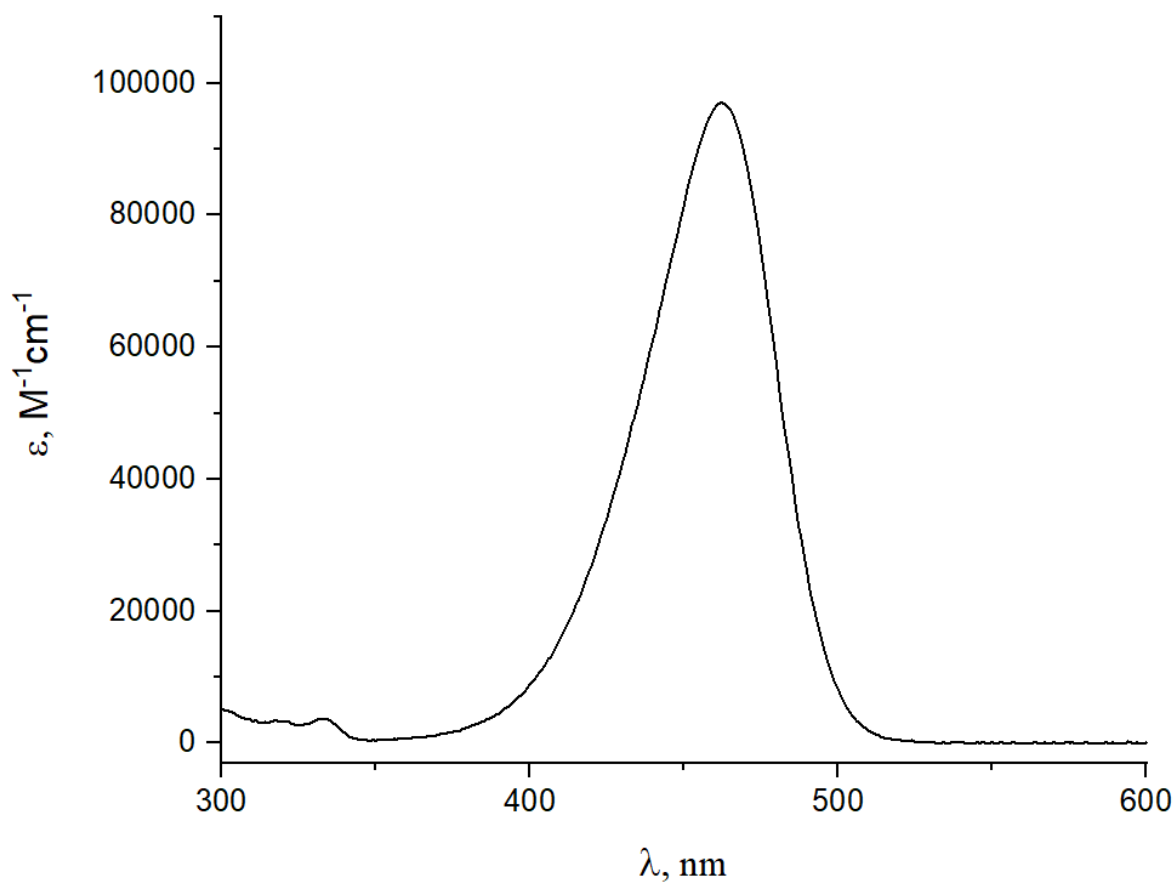

**Figure S12.** Emission spectrum 2-((4-(2-ethylhexyl)-1,2,3,3a,4,8b-hexahydrocyclopenta[*b*]indol-7-yl)methylene)malononitrile **1**.

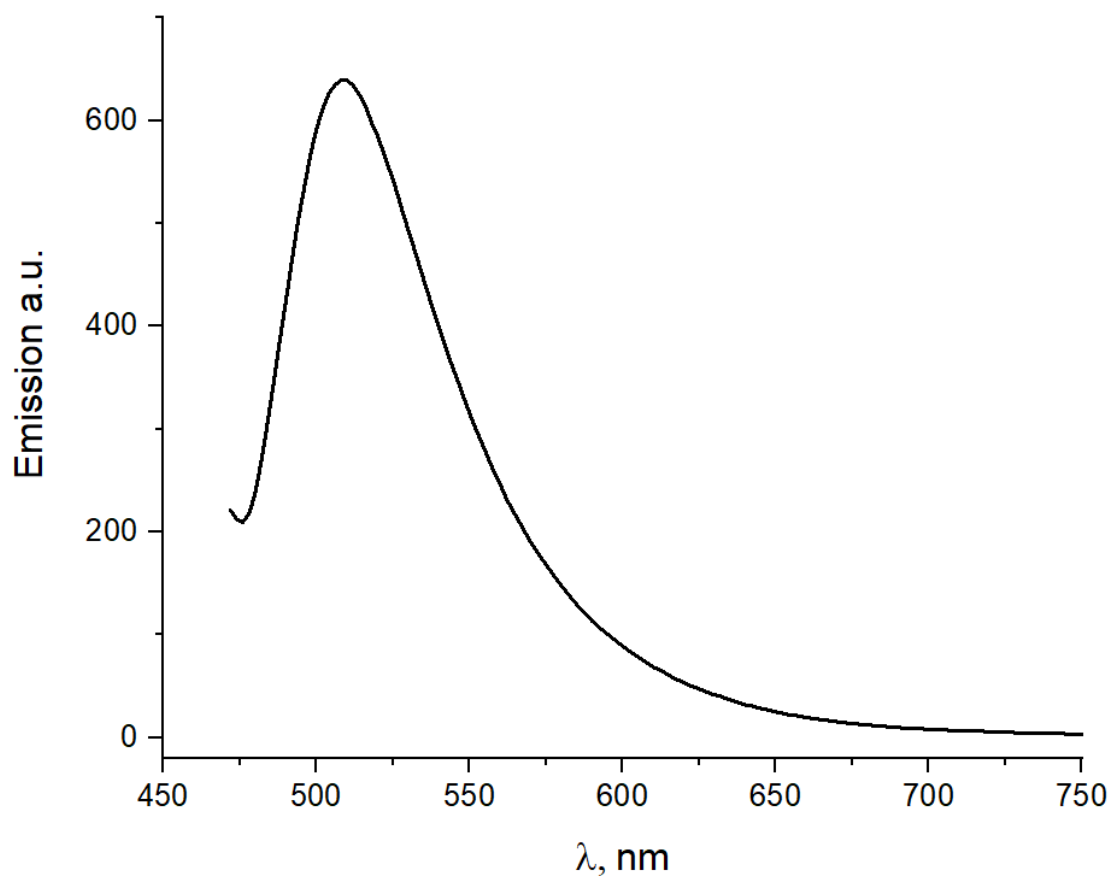

**Figure S13.** Mass-spectrum of 2-((4-(2-ethylhexyl)-1,2,3,3a,4,8b-hexahydrocyclopenta[*b*]indol-7-yl)methylene)malononitrile **1**.

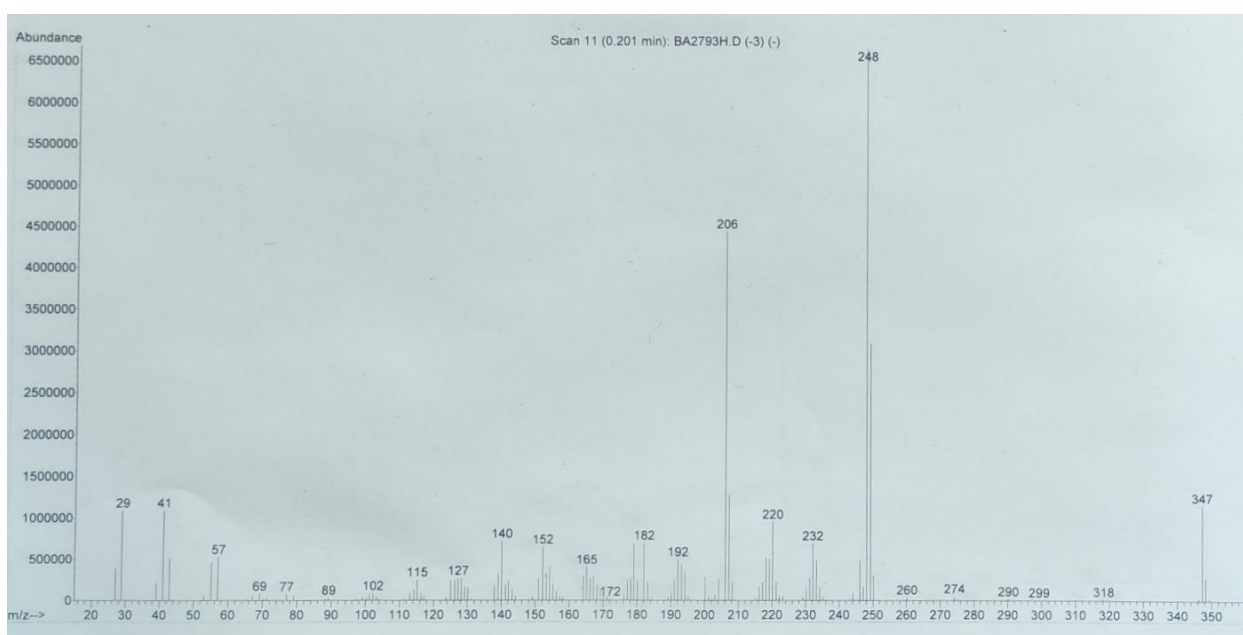

Supplement: s001 [file molbank-2022-M1490-s001.pdf]
