# Supplementary material
Source: MDPI journal article supplement (https://www.mdpi.com/search?q=molbank-2022-M1490)
Supplement: s002 [file molbank-2022-M1490-s002-mod.mol]

Compound3.mol
  corina  11112204423D 1   1.00000     0.00000 
CORINA 4.4.0 0026  12.08.2021
 26 28  0  0  0  0  0  0  0  0999 V2000
   -0.9423    1.4788   -1.1333 C   0  0  0  0  0  0  0  0  0  0  0  0
   -0.1290    0.7456   -0.0382 C   0  0  0  0  0  0  0  0  0  0  0  0
   -0.8623    1.0865    1.2747 C   0  0  0  0  0  0  0  0  0  0  0  0
   -2.3125    1.4442    0.8903 C   0  0  0  0  0  0  0  0  0  0  0  0
   -2.4016    1.2993   -0.6548 C   0  0  0  0  0  0  0  0  0  0  0  0
   -2.5137    2.8947    1.0910 N   0  0  0  0  0  0  0  0  0  0  0  0
   -3.2426    3.3940    0.0142 C   0  0  0  0  0  0  0  0  0  0  0  0
   -3.2196    2.5004   -1.0787 C   0  0  0  0  0  0  0  0  0  0  0  0
   -3.9484    4.5966   -0.1033 C   0  0  0  0  0  0  0  0  0  0  0  0
   -4.6110    4.8901   -1.3103 C   0  0  0  0  0  0  0  0  0  0  0  0
   -4.5706    3.9879   -2.3838 C   0  0  0  0  0  0  0  0  0  0  0  0
   -3.8623    2.7850   -2.2483 C   0  0  0  0  0  0  0  0  0  0  0  0
   -3.2025    3.1599    2.3611 C   0  0  0  0  0  0  0  0  0  0  0  0
   -2.2911    2.7698    3.5266 C   0  0  0  0  0  0  0  0  0  0  0  0
   -3.0491    2.9377    4.8450 C   0  0  0  0  0  0  0  0  0  0  0  0
   -2.1978    2.3962    5.9952 C   0  0  0  0  0  0  0  0  0  0  0  0
   -3.0054    2.4442    7.2938 C   0  0  0  0  0  0  0  0  0  0  0  0
   -2.1541    1.9027    8.4440 C   0  0  0  0  0  0  0  0  0  0  0  0
   -1.0546    3.6708    3.5308 C   0  0  0  0  0  0  0  0  0  0  0  0
   -1.4881    5.1310    3.6755 C   0  0  0  0  0  0  0  0  0  0  0  0
   -5.2619    4.2998   -3.6361 C   0  0  0  0  0  0  0  0  0  0  0  0
   -5.4097    5.6108   -4.0333 C   0  0  0  0  0  0  0  0  0  0  0  0
   -6.2157    5.9268   -5.1740 C   0  0  0  0  0  0  0  0  0  0  0  0
   -6.8551    6.1774   -6.0790 N   0  0  0  0  0  0  0  0  0  0  0  0
   -4.7574    6.6574   -3.3055 C   0  0  0  0  0  0  0  0  0  0  0  0
   -4.2400    7.4877   -2.7281 N   0  0  0  0  0  0  0  0  0  0  0  0
 23 24  3  0      
 22 23  1  0      
 25 26  3  0      
 22 25  1  0      
  1  2  1  0      
  2  3  1  0      
  3  4  1  0      
  4  5  1  0      
  5  1  1  0      
  4  6  1  0      
  6  7  1  0      
  7  8  2  0      
  8  5  1  0      
  7  9  1  0      
  9 10  2  0      
 10 11  1  0      
 11 12  2  0      
 12  8  1  0      
  6 13  1  0      
 13 14  1  0      
 14 15  1  0      
 15 16  1  0      
 16 17  1  0      
 17 18  1  0      
 14 19  1  0      
 19 20  1  0      
 11 21  1  0      
 21 22  2  0      
M  STY  1   1 SUP
M  SLB  1   1   1
M  SAL   1  2  23  24
M  SBL   1  1   2
M  SMT   1 CN
M  SBV   1   2   -0.1933    0.8020
M  STY  1   2 SUP
M  SLB  1   2   2
M  SAL   2  2  25  26
M  SBL   2  1   4
M  SMT   2 CN
M  SBV   2   4   -0.5979   -0.5684
M  END
$$$$
