# Supplementary material
Source: MDPI journal article supplement (https://www.mdpi.com/search?q=molbank-2022-M1490)
Supplement: s002 [file molbank-2022-M1490-s002.inchi]

InChI=1/C23H29N3/c1-3-5-7-17(4-2)16-26-22-9-6-8-20(22)21-13-18(10-11-23(21)26)12-19(14-24)15-25/h10-13,17,20,22H,3-9,16H2,1-2H3
AuxInfo=1/0/N:18,20,17,19,16,2,15,1,3,10,9,21,12,23,25,13,14,11,22,5,8,4,7,24,26,6/E:(14,15)(24,25)/rA:26CCCCCNCCCCCCCCCCCCCCCCCNCN/rB:s1;s2;s3;s1s4;s4;s6;s5d7;s7;d9;s10;s8d11;s6;s13;s14;s15;s16;s17;s14;s19;s11;d21;s22;t23;s22;t25;/rC:-4.4048,3.4149,0;-5.717,2.6089,0;-5.3562,1.1118,0;-3.8209,.9923,0;-3.2329,2.4157,0;-2.6488,-.0067,0;-1.3365,.7991,0;-1.6974,2.2964,0;.1404,.3633,0;1.2565,1.4243,0;.8956,2.9213,0;-.5813,3.3574,0;-2.2503,-1.4943,0;-.7627,-1.8928,0;-.3642,-3.3803,0;1.1234,-3.7789,0;1.5219,-5.2664,0;3.0094,-5.665,0;.3261,-.8038,0;1.8137,-1.2023,0;2.0117,3.9825,0;3.4888,3.5465,0;3.8496,2.0494,0;2.7373,.992,0;4.6049,4.6075,0;6.0767,4.1729,0;
