# Supplementary material
Source: MDPI journal article supplement (https://www.mdpi.com/search?q=molbank-2022-M1490)
Supplement: s002 [file molbank-2022-M1490-s002.mol]

Compound3.mol
  ChemDraw10032216142D

 26 28  0  0  0  0  0  0  0  0999 V2000
   -2.3597    1.8294    0.0000 C   0  0  0  0  0  0  0  0  0  0  0  0
   -3.0627    1.3976    0.0000 C   0  0  0  0  0  0  0  0  0  0  0  0
   -2.8694    0.5956    0.0000 C   0  0  0  0  0  0  0  0  0  0  0  0
   -2.0469    0.5316    0.0000 C   0  0  0  0  0  0  0  0  0  0  0  0
   -1.7319    1.2941    0.0000 C   0  0  0  0  0  0  0  0  0  0  0  0
   -1.4190   -0.0036    0.0000 N   0  0  0  0  0  0  0  0  0  0  0  0
   -0.7160    0.4281    0.0000 C   0  0  0  0  0  0  0  0  0  0  0  0
   -0.9093    1.2302    0.0000 C   0  0  0  0  0  0  0  0  0  0  0  0
    0.0752    0.1946    0.0000 C   0  0  0  0  0  0  0  0  0  0  0  0
    0.6731    0.7630    0.0000 C   0  0  0  0  0  0  0  0  0  0  0  0
    0.4798    1.5650    0.0000 C   0  0  0  0  0  0  0  0  0  0  0  0
   -0.3114    1.7986    0.0000 C   0  0  0  0  0  0  0  0  0  0  0  0
   -1.2055   -0.8005    0.0000 C   0  0  0  0  0  0  0  0  0  0  0  0
   -0.4086   -1.0140    0.0000 C   0  0  0  0  0  0  0  0  0  0  0  0
   -0.1951   -1.8109    0.0000 C   0  0  0  0  0  0  0  0  0  0  0  0
    0.6018   -2.0244    0.0000 C   0  0  0  0  0  0  0  0  0  0  0  0
    0.8153   -2.8213    0.0000 C   0  0  0  0  0  0  0  0  0  0  0  0
    1.6122   -3.0348    0.0000 C   0  0  0  0  0  0  0  0  0  0  0  0
    0.1747   -0.4306    0.0000 C   0  0  0  0  0  0  0  0  0  0  0  0
    0.9716   -0.6441    0.0000 C   0  0  0  0  0  0  0  0  0  0  0  0
    1.0777    2.1335    0.0000 C   0  0  0  0  0  0  0  0  0  0  0  0
    1.8690    1.8999    0.0000 C   0  0  0  0  0  0  0  0  0  0  0  0
    2.0623    1.0979    0.0000 C   0  0  0  0  0  0  0  0  0  0  0  0
    2.2550    0.2986    0.0000 N   0  0  0  0  0  0  0  0  0  0  0  0
    2.4669    2.4683    0.0000 C   0  0  0  0  0  0  0  0  0  0  0  0
    3.0627    3.0348    0.0000 N   0  0  0  0  0  0  0  0  0  0  0  0
 23 24  3  0      
 22 23  1  0      
 25 26  3  0      
 22 25  1  0      
  1  2  1  0      
  2  3  1  0      
  3  4  1  0      
  4  5  1  0      
  5  1  1  0      
  4  6  1  0      
  6  7  1  0      
  7  8  2  0      
  8  5  1  0      
  7  9  1  0      
  9 10  2  0      
 10 11  1  0      
 11 12  2  0      
 12  8  1  0      
  6 13  1  0      
 13 14  1  0      
 14 15  1  0      
 15 16  1  0      
 16 17  1  0      
 17 18  1  0      
 14 19  1  0      
 19 20  1  0      
 11 21  1  0      
 21 22  2  0      
M  STY  1   1 SUP
M  SLB  1   1   1
M  SAL   1  2  23  24
M  SBL   1  1   2
M  SMT   1 CN
M  SBV   1   2   -0.1933    0.8020
M  STY  1   2 SUP
M  SLB  1   2   2
M  SAL   2  2  25  26
M  SBL   2  1   4
M  SMT   2 CN
M  SBV   2   4   -0.5979   -0.5684
M  END
