# Supplementary material
Source: MDPI journal article supplement (https://www.mdpi.com/search?q=molbank-2022-M1490)
Supplement: s003 [file molbank-2022-M1490-s003-mod.mol]

Untitled Document-2
  corina  11112204423D 1   1.00000     0.00000 
CORINA 4.4.0 0026  12.08.2021
 22 24  0  0  0  0  0  0  0  0999 V2000
   -0.6738    1.0675   -0.8654 C   0  0  0  0  0  0  0  0  0  0  0  0
    0.0256    0.5953    0.4331 C   0  0  0  0  0  0  0  0  0  0  0  0
   -0.8218    1.2064    1.5671 C   0  0  0  0  0  0  0  0  0  0  0  0
   -2.2256    1.4606    0.9814 C   0  0  0  0  0  0  0  0  0  0  0  0
   -2.1732    0.9841   -0.4973 C   0  0  0  0  0  0  0  0  0  0  0  0
   -2.4269    2.9185    0.8439 N   0  0  0  0  0  0  0  0  0  0  0  0
   -3.0463    3.1670   -0.3775 C   0  0  0  0  0  0  0  0  0  0  0  0
   -2.9335    2.0587   -1.2447 C   0  0  0  0  0  0  0  0  0  0  0  0
   -3.7230    4.3098   -0.8175 C   0  0  0  0  0  0  0  0  0  0  0  0
   -4.2679    4.3289   -2.1158 C   0  0  0  0  0  0  0  0  0  0  0  0
   -4.1393    3.2172   -2.9592 C   0  0  0  0  0  0  0  0  0  0  0  0
   -3.4621    2.0790   -2.5026 C   0  0  0  0  0  0  0  0  0  0  0  0
   -3.2269    3.4467    1.9570 C   0  0  0  0  0  0  0  0  0  0  0  0
   -2.4395    3.3085    3.2615 C   0  0  0  0  0  0  0  0  0  0  0  0
   -3.3170    3.7471    4.4357 C   0  0  0  0  0  0  0  0  0  0  0  0
   -2.5818    3.4778    5.7502 C   0  0  0  0  0  0  0  0  0  0  0  0
   -3.5088    3.7909    6.9264 C   0  0  0  0  0  0  0  0  0  0  0  0
   -2.7737    3.5216    8.2409 C   0  0  0  0  0  0  0  0  0  0  0  0
   -1.1914    4.1914    3.1999 C   0  0  0  0  0  0  0  0  0  0  0  0
   -1.6098    5.6599    3.1033 C   0  0  0  0  0  0  0  0  0  0  0  0
   -4.7094    3.2453   -4.3111 C   0  0  0  0  0  0  0  0  0  0  0  0
   -5.2950    4.2332   -4.7020 O   0  0  0  0  0  0  0  0  0  0  0  0
  1  2  1  0      
  2  3  1  0      
  3  4  1  0      
  4  5  1  0      
  5  1  1  0      
  4  6  1  0      
  6  7  1  0      
  7  8  2  0      
  8  5  1  0      
  7  9  1  0      
  9 10  2  0      
 10 11  1  0      
 11 12  2  0      
 12  8  1  0      
  6 13  1  0      
 13 14  1  0      
 14 15  1  0      
 15 16  1  0      
 16 17  1  0      
 17 18  1  0      
 14 19  1  0      
 19 20  1  0      
 11 21  1  0      
 21 22  2  0      
M  END
$$$$
