# Supplementary material
Source: MDPI journal article supplement (https://www.mdpi.com/search?q=molbank-2022-M1490)
Supplement: s003 [file molbank-2022-M1490-s003.mol]

Untitled Document-2
  ChemDraw10032216142D

 22 24  0  0  0  0  0  0  0  0999 V2000
   -1.7628    2.2800    0.0000 C   0  0  0  0  0  0  0  0  0  0  0  0
   -2.4658    1.8483    0.0000 C   0  0  0  0  0  0  0  0  0  0  0  0
   -2.2725    1.0463    0.0000 C   0  0  0  0  0  0  0  0  0  0  0  0
   -1.4500    0.9823    0.0000 C   0  0  0  0  0  0  0  0  0  0  0  0
   -1.1350    1.7448    0.0000 C   0  0  0  0  0  0  0  0  0  0  0  0
   -0.8222    0.4471    0.0000 N   0  0  0  0  0  0  0  0  0  0  0  0
   -0.1191    0.8788    0.0000 C   0  0  0  0  0  0  0  0  0  0  0  0
   -0.3125    1.6808    0.0000 C   0  0  0  0  0  0  0  0  0  0  0  0
    0.6721    0.6452    0.0000 C   0  0  0  0  0  0  0  0  0  0  0  0
    1.2700    1.2137    0.0000 C   0  0  0  0  0  0  0  0  0  0  0  0
    1.0767    2.0157    0.0000 C   0  0  0  0  0  0  0  0  0  0  0  0
    0.2854    2.2493    0.0000 C   0  0  0  0  0  0  0  0  0  0  0  0
   -0.6086   -0.3498    0.0000 C   0  0  0  0  0  0  0  0  0  0  0  0
    0.1883   -0.5633    0.0000 C   0  0  0  0  0  0  0  0  0  0  0  0
    0.4018   -1.3602    0.0000 C   0  0  0  0  0  0  0  0  0  0  0  0
    1.1987   -1.5737    0.0000 C   0  0  0  0  0  0  0  0  0  0  0  0
    1.4122   -2.3706    0.0000 C   0  0  0  0  0  0  0  0  0  0  0  0
    2.2091   -2.5841    0.0000 C   0  0  0  0  0  0  0  0  0  0  0  0
    0.7716    0.0200    0.0000 C   0  0  0  0  0  0  0  0  0  0  0  0
    1.5685   -0.1935    0.0000 C   0  0  0  0  0  0  0  0  0  0  0  0
    1.6746    2.5841    0.0000 C   0  0  0  0  0  0  0  0  0  0  0  0
    2.4658    2.3506    0.0000 O   0  0  0  0  0  0  0  0  0  0  0  0
  1  2  1  0      
  2  3  1  0      
  3  4  1  0      
  4  5  1  0      
  5  1  1  0      
  4  6  1  0      
  6  7  1  0      
  7  8  2  0      
  8  5  1  0      
  7  9  1  0      
  9 10  2  0      
 10 11  1  0      
 11 12  2  0      
 12  8  1  0      
  6 13  1  0      
 13 14  1  0      
 14 15  1  0      
 15 16  1  0      
 16 17  1  0      
 17 18  1  0      
 14 19  1  0      
 19 20  1  0      
 11 21  1  0      
 21 22  2  0      
M  END
